# Supplementary material for: Construction of glutathione-responsive paclitaxel prodrug nanoparticles for image-guided targeted delivery and breast cancer therapy
Source: Royal Society of Chemistry journal article supplement (doi:10.1039/d4ra00610k), 2024-01-01
Supplement: d4ra00610k1.pdf [file d4ra00610k1.pdf]

## Supporting Information

### Construction of glutathione-responsive paclitaxel prodrug nanoparticles for image-guided targeted delivery and breast cancer therapy

Weiwei Ma\*, Qiufeng Zhao, Shilong Zhu, Xinyue Wang, Chuangchuang Zhang,  
Daming Ma, Na Li\*, Yanyan Yin\*

*School of Pharmacy, Xinxiang Medical University, Henan 453003, P. R. China*

\* Corresponding Author.

*E-mail address:* 081011@xxmu.edu.cn (W. Ma), 879623846@qq.com (N. Li),  
105772801@qq.com (Y. Yan)

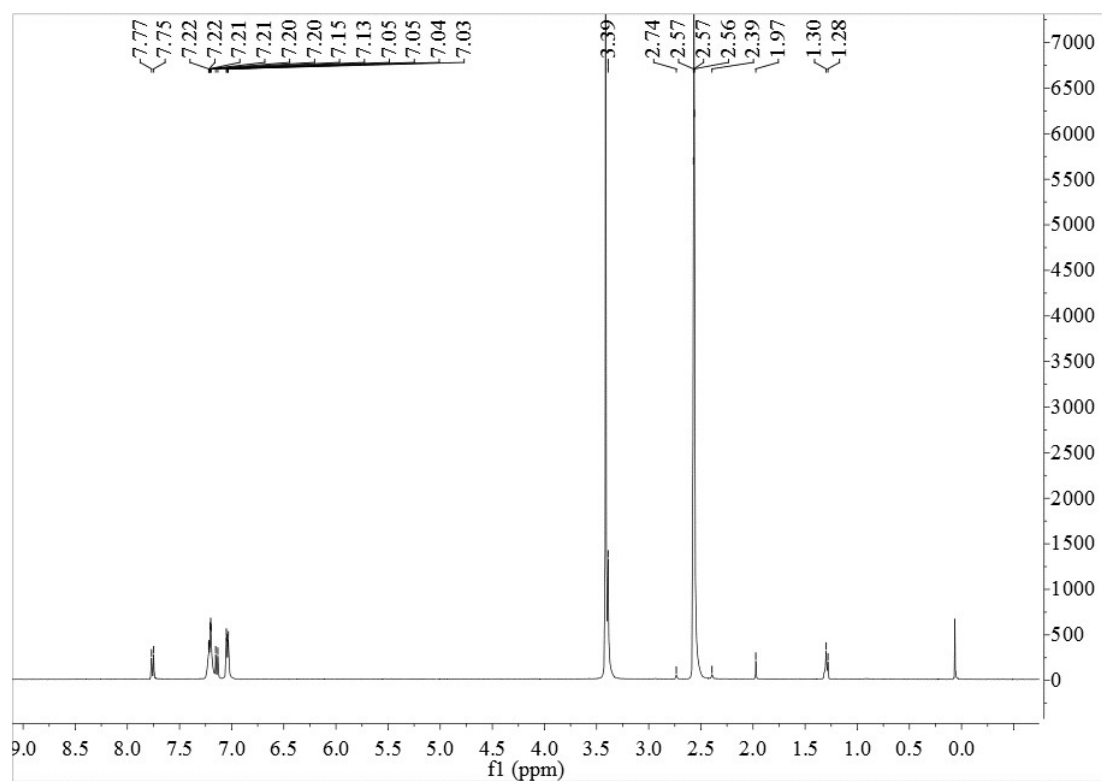

**Figure S1.**  $^1\text{H}$  NMR of TPE-CS

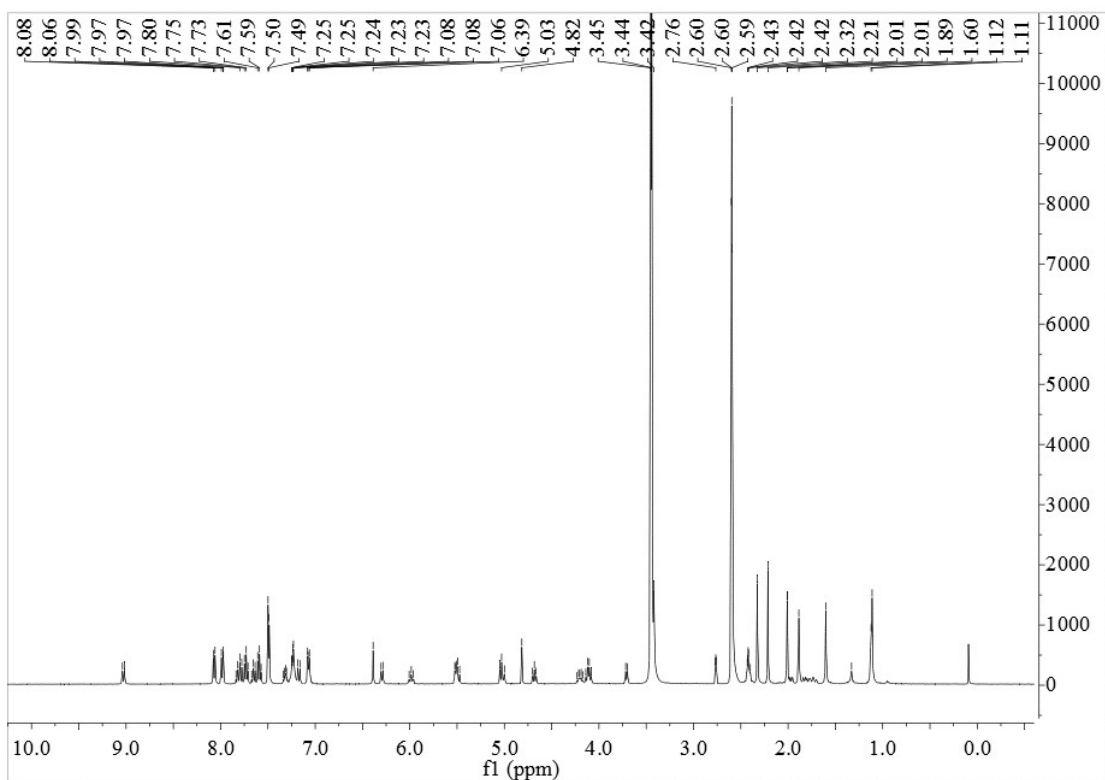

**Figure S2.** <sup>1</sup>H NMR of TPE-CS-SS-PTX

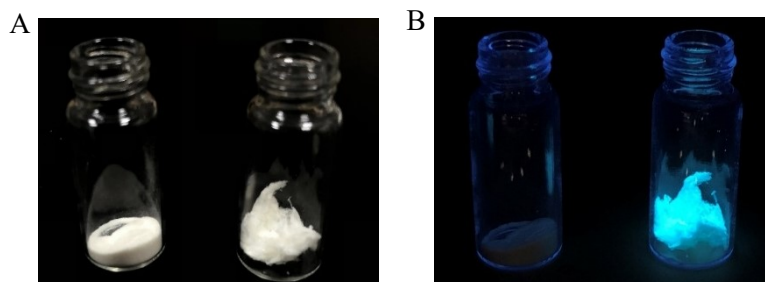

**Figure S3.** Photographs of solid powders of TPE-CS and TPE-CS-SS-PTX taken under room lighting and UV illumination.

**Table S1**

The molecular weight and polydispersity of CS and TPE-CS-SS-PTX.

| Polymer       | Mn (kD) | Mw (kD) | Polydispersity |
|---------------|---------|---------|----------------|
| CS            | 27.34   | 30.12   | 1.10           |
| TPE-CS-SS-PTX | 30.78   | 44.85   | 1.46           |
